# Supplementary material
Source: MDPI journal article supplement (https://www.mdpi.com/search?q=dairy-01-00019)
Supplement: s001 [file dairy-01-00019-s001.pdf]

## 5. Supplementary Materials

**Table S1.** Changes in the oligosaccharide content of colostrum and milks as a result of days post parturition<sup>a</sup>

| Oligosaccharide    | Days Post Parturition |                       |                       |                       |                       |                     | <i>p - value</i> |          |        |          |             |          |
|--------------------|-----------------------|-----------------------|-----------------------|-----------------------|-----------------------|---------------------|------------------|----------|--------|----------|-------------|----------|
|                    | Colostrum             | Day 1                 | Day 2                 | Day 3                 | Day 4                 | Day 5               | Time             | $\eta^2$ | Parity | $\eta^2$ | Time*Parity | $\eta^2$ |
| <b>3-FL</b>        | 734 ± 333.94          | 225.48 ± 63.14        | 198.66 ± 111.15       | 206.63 ± 58.18        | 252.92 ± 64.26        | 267.08 ± 67.67      | <0.001           | 0.70     | 0.87   | 0.03     | 0.83        | 0.03     |
| <b>Lactose</b>     | 23389.65<br>± 5022.65 | 39166.94<br>± 2148.75 | 41481.67<br>± 2865.87 | 42412.78<br>± 1882.23 | 43569.39<br>± 1668.97 | 44169.89<br>± 954.1 | <0.001           | 0.92     | 0.20   | 0.19     | 0.88        | 0.03     |
| <b>LNnT</b>        | 13.87 ± 7.77          | 1.44 ± 1.16           | 1.72 ± 2.64           | 1.19 ± 0.89           | 0.31 ± 0.39           | 0.15 ± 0            | <0.001           | 0.77     | 0.30   | 0.16     | 0.32        | 0.15     |
| <b>LNnH</b>        | 62.96 ± 24.47         | 57.88 ± 20.94         | 25.92 ± 8.19          | 20.36 ± 6.48          | 15 ± 5.18             | 11.58 ± 2.49        | <0.001           | 0.84     | 0.27   | 0.16     | 0.06        | 0.26     |
| <b>LNT</b>         | 0.47 ± 0.32           | 1.37 ± 0.38           | 1.95 ± 1.33           | 1.07 ± 0.29           | 1.48 ± 0.88           | 1.07 ± 0.25         | <0.001           | 0.41     | 1.00   | 0.00     | 0.26        | 0.16     |
| <b>Sialic Acid</b> | 32.52 ± 7.34          | 57.37 ± 12.8          | 43.12 ± 10.68         | 30.52 ± 6.2           | 25.28 ± 6.73          | 22.16 ± 5.2         | <0.001           | 0.86     | 0.67   | 0.05     | 0.25        | 0.16     |
| <b>LSTc</b>        | 147.45 ± 67.65        | 22.16 ± 13.79         | 5.76 ± 3.47           | 2.97 ± 1.9            | 2.02 ± 1.19           | 1.74 ± 0.94         | <0.001           | 0.88     | 0.01   | 0.45     | 0.02        | 0.38     |
| <b>3'-SNL</b>      | 19.02 ± 8.02          | 17.21 ± 5.32          | 7.12 ± 3.41           | 3.18 ± 1.72           | 2.65 ± 1.3            | 2.27 ± 1.27         | <0.001           | 0.83     | 0.38   | 0.13     | 0.20        | 0.19     |
| <b>6'-SL</b>       | 113.35 ± 50.46        | 59.21 ± 22.95         | 44.79 ± 13.69         | 43.62 ± 15.3          | 41 ± 18.4             | 35.65 ± 17.03       | <0.001           | 0.78     | 0.00   | 0.56     | 0.07        | 0.28     |
| <b>3'-SL</b>       | 786.62 ± 252.87       | 163.01 ± 60.3         | 85.51 ± 23.84         | 79.84 ± 25.24         | 69.32 ± 24.25         | 63.98 ± 20.94       | <0.001           | 0.91     | 0.05   | 0.32     | 0.21        | 0.19     |
| <b>DSLNT</b>       | 121.37 ± 31.92        | 38.6 ± 18.42          | 23.63 ± 9.01          | 8.7 ± 6.45            | 7.82 ± 7.1            | 7.76 ± 5.65         | <0.001           | 0.95     | 0.08   | 0.30     | 0.07        | 0.27     |
| <b>DSL</b>         | 520.02 ± 142.18       | 66.54 ± 25.05         | 38.35 ± 19.55         | 37.63 ± 16.34         | 29.44 ± 15.14         | 38.93 ± 9.71        | <0.001           | 0.93     | 0.34   | 0.14     | 0.35        | 0.13     |

<sup>a</sup>Values are the mean ± standard deviation (mg/L); in total 108 samples were obtained and analysed.  $\eta^2$  partial eta<sup>2</sup> effect size where effect sizes are small ( $0.01 \leq \eta^2 < 0.06$ ), medium ( $0.06 \leq \eta^2 < 0.14$ ), and large ( $\eta^2 \geq 0.14$ ).
